# Supplementary material for: Rapid, stable and self-powered perovskite detectors via a fast chemical vapor deposition process
Source: Royal Society of Chemistry journal article supplement (doi:10.1039/c7ra01430a), 2017-01-01
Supplement: c7ra01430a1.pdf [file c7ra01430a1.pdf]

## Supporting Information to

### **Rapid, stable and self-powered perovskite detectors via a fast chemical vapor deposition process**

Guoqing Tong,<sup>a</sup> Xiangshun Geng,<sup>b</sup> Yongqiang Yu,<sup>b</sup> Linwei Yu,<sup>\*a</sup> Jun Xu,<sup>a</sup> Yang Jiang,<sup>\*b</sup> Yun Sheng,<sup>c</sup> Yi Shi,<sup>a</sup> and Kunji Chen<sup>a</sup>

<sup>a</sup>National Laboratory of Solid State Microstructures and School of Electronics Science and Engineering/Collaborative Innovation Centre of Advanced Microstructures, Nanjing University, Nanjing 210093, P. R. China. Email: [yulinwei@nju.edu.cn](mailto:yulinwei@nju.edu.cn)

<sup>b</sup>School of Materials Science and Engineering, Hefei University of Technology, Hefei 230009, P. R. China. Email: [apjiang@hfut.edu.cn](mailto:apjiang@hfut.edu.cn).

<sup>c</sup>State Key Lab of Photovoltaic Science and Technology, Trina Solar, Changzhou 213031, P. R. China

To whom correspondence should be addressed Email: [yulinwei@nju.edu.cn](mailto:yulinwei@nju.edu.cn) and [apjiang@hfut.edu.cn](mailto:apjiang@hfut.edu.cn).

### **Experimental Section**

*Methylamine iodide (MAI)*: Methylamine (33 wt % ethanol) and hydroiodic acid (HI, 45 wt % in water) were reacted in 250 mL three-neck flask at 0 °C for 3 h with continuous stirring by a magnetic stirrer. HI was added dropwise during the stirring process. After evaporated in a rotary evaporator at 60 °C for 3 h, and the white precipitation was then dissolved in ethanol and precipitated with the addition of 400 mL of diethyl ether. Finally, MAI (CH<sub>3</sub>NH<sub>3</sub>I) white powder was vacuum-dried for overnight.

*Perovskite photovoltaic Devices*: FTO glasses (15 Ω/sq) were washed with soap, acetone, ethanol and deionized water using ultrasonication. TiO<sub>2</sub> compacted layer was then deposited on the FTO substrates by spin-coating of titanium isopropoxide (750 μL in 5 mL ethanol) diluted in the acid ethanol solution and sintered at 500 °C in air and subsequently treated in 40 mM aqueous solution of TiCl<sub>4</sub> for 30 min at 70 °C. The compacted layer was formed after annealing at 500 °C for 30 min again. Lead iodide (PbI<sub>2</sub>, 99.99%) powder was dissolved in N,N-dimethylformamide (DMF, Aladdin) at a concentration of 460 mg mL<sup>-1</sup> and stirred at 70 °C for 10 hours. 80 μL dissolved solution was spin-coated on FTO/ c-TiO<sub>2</sub> substrates at 4000

---

rpm for 30 s. After annealing at 60 °C for 30min, the  $\text{PbI}_2$  substrates and MAI powder were placed in the furnace, as shown in Fig. 1a. The system was pumped to  $10^{-3}$  Pa by turbo molecular pump, and using Ar as carrier gas, followed by subtracted heated to 100 °C, 120 °C, respectively. After reacted, the  $\text{CH}_3\text{NH}_3\text{PbI}_3$  films were in-suit annealing for 30min in the Ar atmosphere in the furnace zone II. The hole-transport layer was spin-coated at 3500 rpm for 30 s as previous report.<sup>1, 2</sup> Finally, 120nm thick silver as cathode was deposited by thermal evaporation ( $\sim 0.5 \text{ \AA s}^{-1}$ ). The active area is  $0.09 \text{ cm}^2$ . All the processes were in relative humidity below 40%.

*Characterization:* The phase of products were identified by X-ray powder diffraction (XRD) utilizing a Cu K $\alpha$  radiation with the scanning rang from 10° to 60°. The morphology of the samples was investigated by the field emission scanning electron microscopy (FE-SEM, Sigma Zeiss), atomic force microscopy (AFM, Dimension), respectively. The electrical characterization of the perovskite devices were conducted with a semiconductor parameter analyzer system (Keithley 4200-SCS). Noise current was mesured using a lock-in amplifier (SR830) in a dark room shielded with metal from 1Hz to 700Hz. To investigated the response speed, a home-built measurement system combining a laser diode (650 nm), oscilloscope (Tektronix, TDS2012B) and pulse generator was applied by modulated pulsed light illumination (100 Hz  $\sim$  4 MHz). Photocurrent density–voltage ( $J$ – $V$ ) measurements of perovskite solar cells were carrid out on a Keithley 2636 system sourcemeter with a Xenon Lamp Solar Simulator equipped with a light intensity of  $\sim 100 \text{ mW cm}^{-2}$ . All the measurements were performed at zero bias and the room temperature with the relative humidity below 40%.

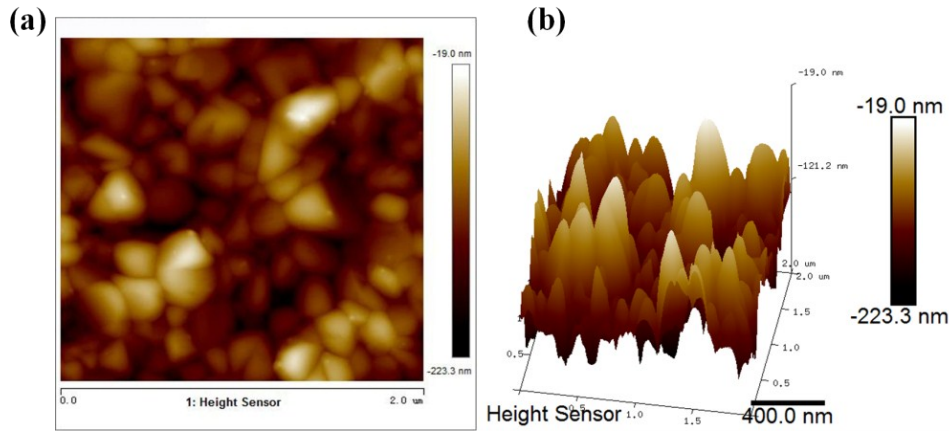

**Fig. S1** The atomic force microscopy (AFM) graph of perovskite film (a) 2D and (b) 3D height image ( $2 \times 2 \mu\text{m}$ ).

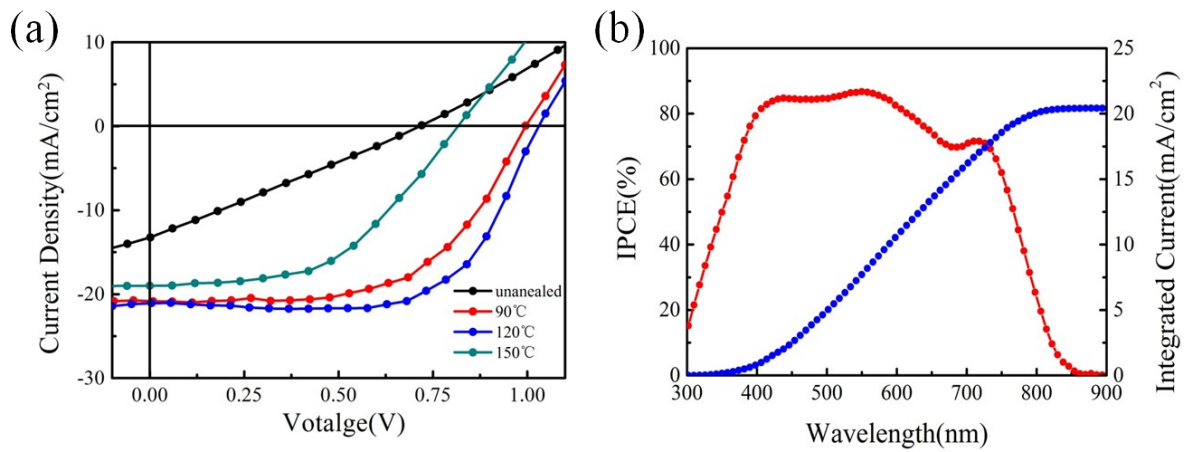

**Fig. S2** (a) The current density–voltage ( $J$ – $V$ ) characteristic curves of the photovoltaic devices annealed at different temperatures under AM 1.5 irradiation. (b) the IPCE spectrum and the accumulative photocurrent density integral of the perovskite photovoltaic devices.

**Table S1** Device performance parameters of perovskite photovoltaic devices.

| Temperature<br>[°C] | $V_{oc}$<br>[V] | $J_{sc}$<br>[ $\text{mA cm}^{-2}$ ] | FF   | PCE<br>(%) |
|---------------------|-----------------|-------------------------------------|------|------------|
| unannealed          | 0.73            | 13.45                               | 0.25 | 2.46       |
| 90                  | 0.98            | 20.85                               | 0.60 | 12.26      |
| 120                 | 1.03            | 21.25                               | 0.69 | 15.10      |
| 150                 | 0.81            | 19.12                               | 0.51 | 7.90       |

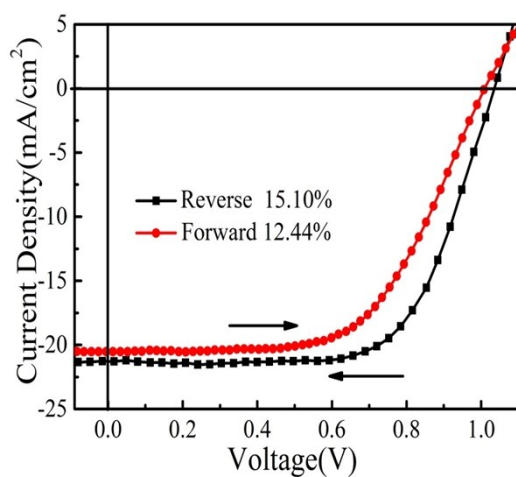

**Fig. S3**  $J$ - $V$  curves of perovskite photovoltaic device measured under forward and reverse scans.

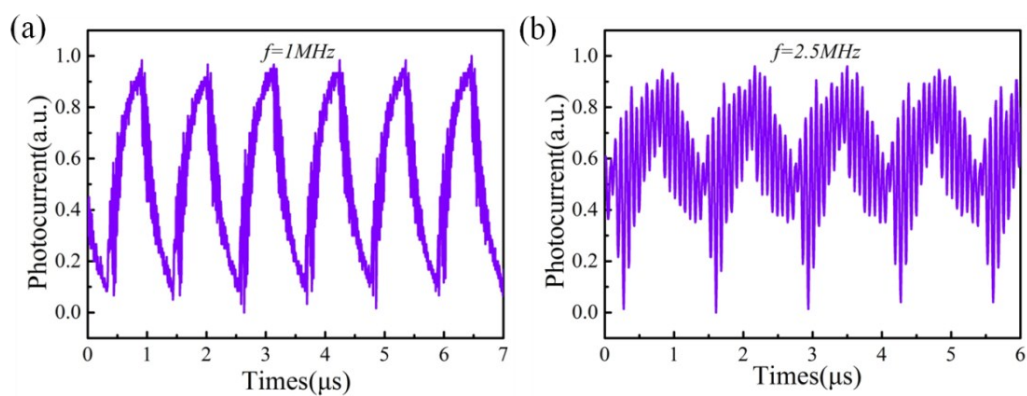

**Fig. S4** Time response characteristics of the perovskite device under (a) 1 MHz and (b) 2.5 MHz pulsed light illumination.

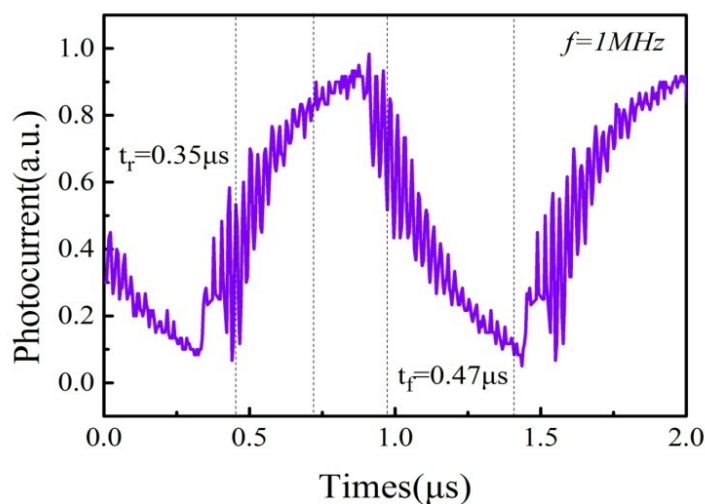

**Fig. S5** The magnified and normalized plots of one response cycle 1 MHz.

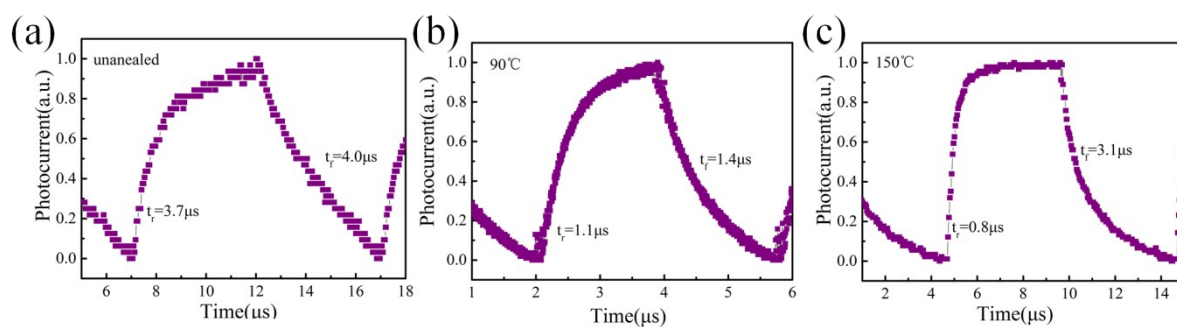

**Fig. S6** The magnified and normalized plots of one response cycle 300 kHz with the annealing temperature at (a) unannealed; (b) 90°C; (c) 150 °C.

## REFERENCE

1. N. J. Jeon, J. H. Noh, Y. C. Kim, W. S. Yang, S. Ryu and S. I. Seok, *Nat. Mater.*, 2014, **13**, 897-903.
2. C. Liu, J. Fan, X. Zhang, Y. Shen, L. Yang and Y. Mai, *ACS Appl Mater Interfaces*, 2015, **7**, 9066-9071.
